# Supplementary material for: Validation of simple measures of aortic distensibility based on standard 4-chamber cine CMR: a new approach for clinical studies
Source: Springer Nature journal article supplement (doi:10.1007/s00392-019-01525-8), 2019-07-13

**Figure 1S**

Distribution of AD values obtained by two observers (black dots observer 1, white dots observer 2) depending on the angulation used at the time of image acquisition. Aortic areas were acquired either by directly contoured aortic areas (A) or based on diameter measurements (B).

**Supplementary Figure**

**Figure 1S**

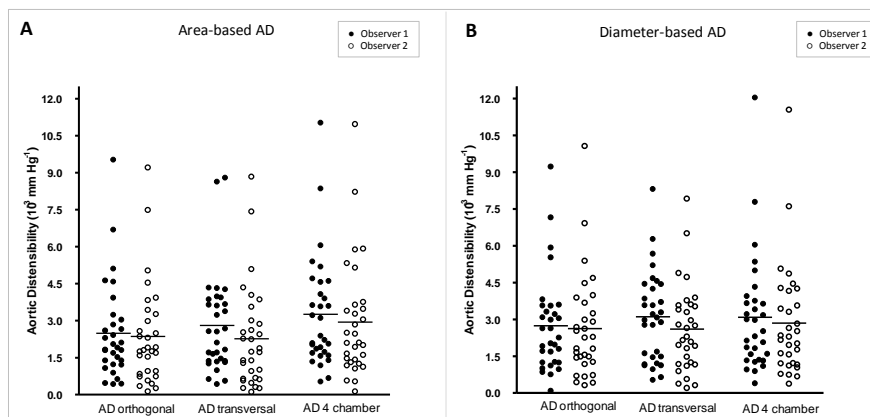

Supplement: MOESM1 [file 16926818]
